# Supplementary material for: Dysregulation of macrophage polarization is associated with the metastatic process in osteosarcoma
Source: PubMed Central journal article supplement (PMC5346643; doi:10.18632/oncotarget.13055), 2016-11-13
Supplement: oncotarget-07-78343-s001.pdf [file oncotarget-07-78343-s001.pdf]

# Dysregulation of macrophage polarization is associated with the metastatic process in osteosarcoma

Supplementary Material

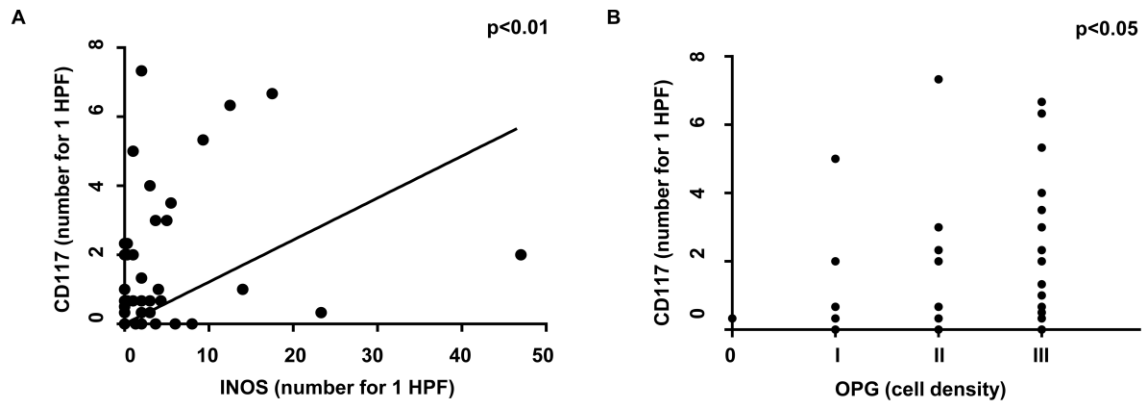

Supplementary Figure 1: Correlation between CD117 expression and INOS (A) or OPG (B) expression in osteosarcoma samples

**Supplementary Table 1: Primary antibodies used for the immunohistochemistry study**

| <b>Human antigen</b> | <b>Antibody (host)</b> | <b>Clone</b>         | <b>Source</b> | <b>Dilution</b> |
|----------------------|------------------------|----------------------|---------------|-----------------|
| <b>CD3</b>           | Polyclonal (rabbit)    | A052                 | DAKO          | 1/100           |
| <b>CD20</b>          | Monoclonal (mouse)     | M0755, L26           | DAKO          | 1/250           |
| <b>CD4</b>           | Monoclonal (mouse)     | NCL- L-CD4-368, 4B12 | Novocastra    | 1/50            |
| <b>CD8</b>           | Monoclonal (mouse)     | DM7103, C8/144B      | DAKO          | 1/50            |
| <b>CD68</b>          | Monoclonal (mouse)     | M0876, PG-M1         | DAKO          | 1/200           |
| <b>INOS</b>          | Polyclonal (rabbit)    | ab15323              | Abcam         | 1/100           |
| <b>CD163</b>         | Monoclonal (mouse)     | NCL-L-CD16, 10D6     | Novocastra    | 1/100           |
| <b>CD117</b>         | Polyclonal (rabbit)    | A4502, c-kit         | DAKO          | 1/750           |
| <b>CD31</b>          | Monoclonal (mouse)     | M082, JC70A          | DAKO          | 1/50            |
| <b>SMA</b>           | Monoclonal (mouse)     | F/MS-113, 1A4        | MM France     | 1/400           |
| <b>CD146</b>         | Monoclonal (rabbit)    | ab75769              | Abcam         | 1/200           |
| <b>Ki-67</b>         | Monoclonal (mouse)     | MIB-1                | Dako          | 1/100           |
| <b>OPG</b>           | Polyclonal (rabbit)    | ab9986               | Abcam         | 1/50            |
| <b>RANKL</b>         | Polyclonal (goat)      | AF626                | R&D Systems   | 1/20            |

**Supplementary Table 2: multivariate logistic regression analysis to study the relationship between different variables and the presence of metastases.**

|                          | <b>Estimate</b> | <b>2.5 %</b> | <b>97.5 %</b> | <b>OR</b> | <b>IC 2.5%</b> | <b>IC 97.5%</b> | <b>Std. Error</b> | <b>z value</b> | <b>Pr(&gt; z )</b> |
|--------------------------|-----------------|--------------|---------------|-----------|----------------|-----------------|-------------------|----------------|--------------------|
| Male                     | 2,517           | 0,0523       | 6,284256      | 12,39137  | 1,054394       | 536,0651        | 1,4917            | 1,687          | 0,0915             |
| Age                      | 0,08972         | 0,0112       | 0,210767      | 1,093868  | 1,011872       | 1,234625        | 0,0476            | 1,885          | 0,0594             |
| Cd68                     | -0,19883        | -0,512       | 0,022245      | 0,819689  | 0,599363       | 1,022495        | 0,12761           | -1,558         | 0,1192             |
| cd20                     | 1,29536         | -0,441       | 3,445052      | 3,652311  | 0,643191       | 31,34491        | 0,92546           | 1,4            | 0,1616             |
| <b>INOS</b>              | -0,80466        | -1,732       | -0,22411      | 0,44724   | 0,176863       | 0,799228        | 0,3704            | -2,172         | <b>0,0298</b>      |
| CD117                    | 0,44663         | -0,172       | 1,207732      | 1,563036  | 0,84192        | 3,345886        | 0,32694           | 1,366          | 0,1719             |
| <b>OPG</b>               | -1,76788        | -3,968       | -0,38735      | 0,170694  | 0,018904       | 0,678856        | 0,84609           | -2,089         | <b>0,0367</b>      |
| CD31<br>(density score)  | 1,44963         | -0,091       | 3,256526      | 4,261537  | 0,912723       | 25,95919        | 0,8197            | 1,768          | 0,077              |
| CD146<br>(density score) | 1,55114         | -0,458       | 4,542223      | 4,716844  | 0,63228        | 93,89932        | 1,25641           | 1,235          | 0,217              |

**Supplementary Table 3: Cox model to test the relationship between different variables and survival time of patients**

|                                                  | <b>Coef</b>             | <b>Exp(coef)</b>       | <b>Lower.95</b> | <b>Upper.95</b> | <b>p</b>          |
|--------------------------------------------------|-------------------------|------------------------|-----------------|-----------------|-------------------|
| <b>Histological response to chemotherapy III</b> | -1.5133                 | 0.2202                 | 0.07328         | 0.6617          | <b>0.00702</b>    |
| <b>Metastasis</b>                                | 2.4825                  | 11.9715                | 2.764           | 51.85           | <b>0.000903</b>   |
| <b>Age</b>                                       | 5.197 <sup>e</sup> -02  | 1.53 <sup>e</sup> +00  | 1.0271          | 1.0803          | <b>&lt;0.0001</b> |
| Sex                                              | 5.364 <sup>e</sup> -01  | 1.710 <sup>e</sup> +00 | 0.4807          | 6.0813          | 0.40738           |
| CD3                                              | -2.229 <sup>e</sup> -01 | 8.002 <sup>e</sup> -01 | 0.6122          | 1.0460          | 0.10287           |
| <b>CD4</b>                                       | 1.030 <sup>e</sup> +00  | 2.801 <sup>e</sup> +00 | 1.3480          | 5.8190          | <b>0.00578</b>    |
| CD8                                              | 3.756 <sup>e</sup> -01  | 1.038 <sup>e</sup> +00 | 0.8835          | 1.2202          | 0.64840           |
| <b>CD68</b>                                      | -5.021 <sup>e</sup> -02 | 9.510 <sup>e</sup> -01 | 0.9052          | 0.9991          | <b>0.04609</b>    |
| INOS                                             | -1.006 <sup>e</sup> -02 | 9.900 <sup>e</sup> -01 | 0.9310          | 1.0527          | 0.74837           |
| CD163                                            | -7.902 <sup>e</sup> -05 | 9.999 <sup>e</sup> -01 | 0.9055          | 1.1042          | 0.99875           |
| CD117                                            | 1.642 <sup>e</sup> -01  | 1.178 <sup>e</sup> +00 | 0.7769          | 1.7875          | 0.43983           |
| Ki-67                                            | 2.976e-01               | 1.030 <sup>e</sup> +00 | 0.9687          | 1.0957          | 0.34375           |
